# Supplementary material
Source: Springer Nature journal article supplement (https://www.springermedizin.de/resource/supplementary/12879_2012_2262_MOESM1_ESM.pdf/9443738)

(A) G I C R C I C G R G I C R C I C G R . I G G R V P G V G V P G V G H H H H H H

RC-1                                          Factor Xa                                          Linker                                          6XHis Tag

(B) NS2B-NS3 Protease

6XHis tag

NS2B  
47 a.a.

Linker  
9 a.a.

NS3  
180 a.a.

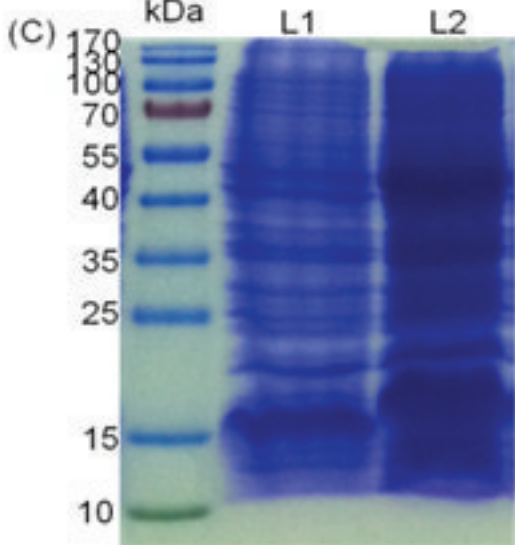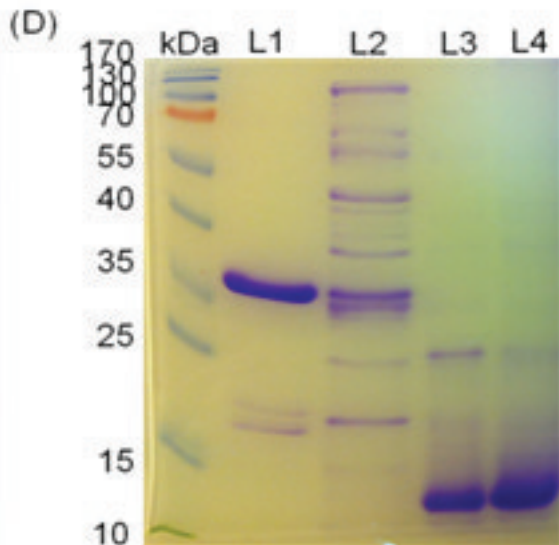

Supplement: MOESM1 [file 9443738]
